# Supplementary material for: A divergent one-pot thiol-Michael strategy to create β-thiophene-fused porphyrins
Source: Royal Society of Chemistry journal article supplement (doi:10.1039/d4ob00598h), 2024-01-01
Supplement: d4ob00598h1.pdf [file d4ob00598h1.pdf]

## Divergent one-pot thiol-Michael strategy to create $\beta$ -thiophene-fused porphyrins

Jagmeet Singh, Abhijeet Singh, and Mahendra Nath\*

Department of Chemistry, Faculty of Science, University of Delhi, Delhi 110 007, India

\*Email: mnath@chemistry.du.ac.in

| S. No. | Table of contents                                                                            | Page No. |
|--------|----------------------------------------------------------------------------------------------|----------|
| 1.     | Electronic absorption spectra of porphyrins <b>3a-g</b> and <b>4a-g</b> in CHCl <sub>3</sub> | S2       |
| 2.     | <sup>1</sup> H NMR, <sup>13</sup> C NMR and ESI-HRMS spectra of prepared porphyrins          | S3–S19   |

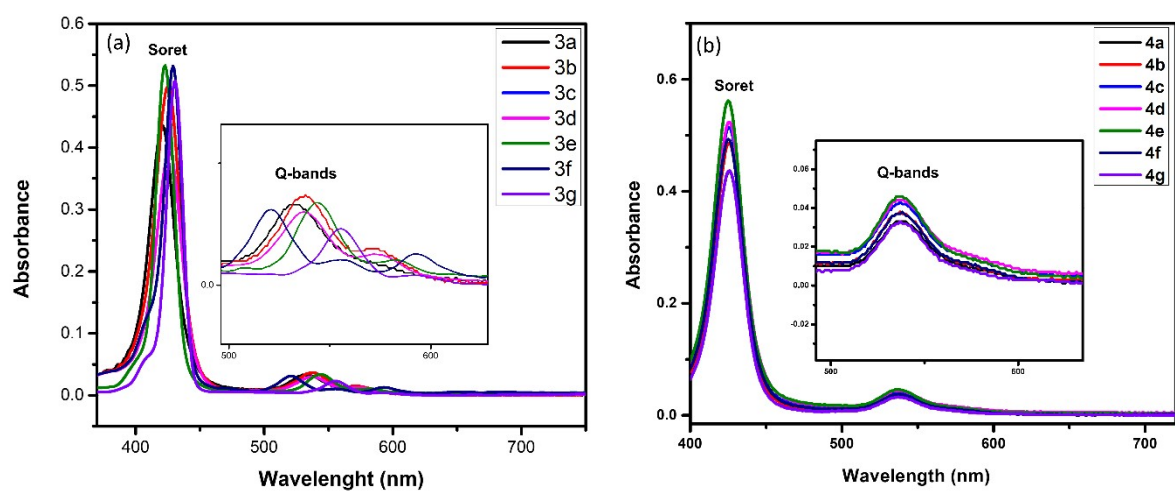

**Figure S1.** Electronic absorption spectra of porphyrins (a) **3a-g** and (b) **4a-g** in  $\text{CHCl}_3$  ( $1.5 \times 10^{-6}$  M) at 298 K. Inset shows Q-bands.

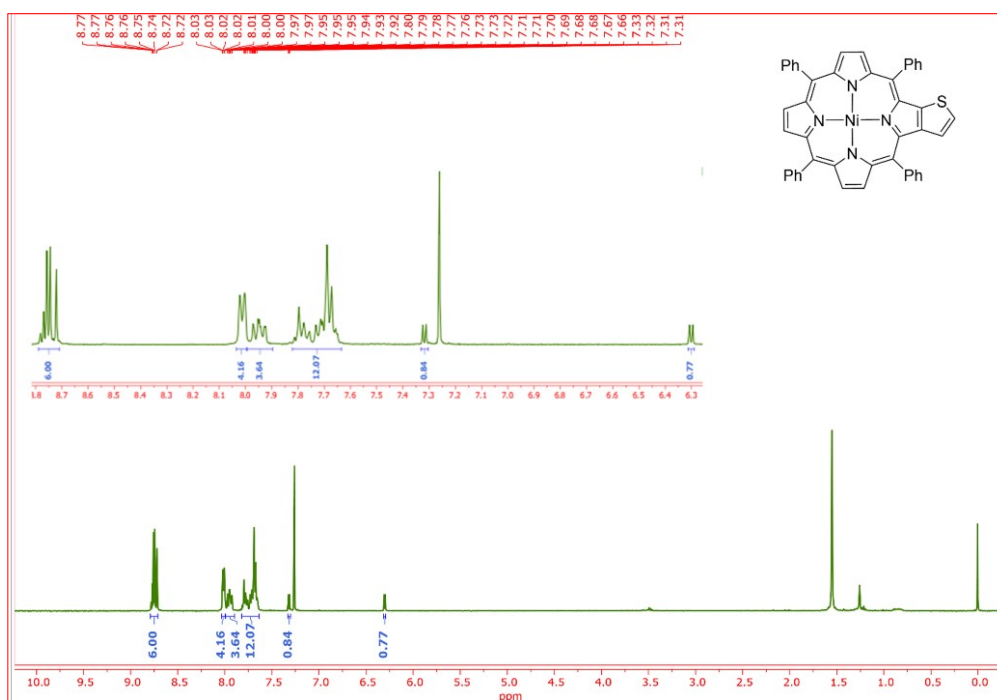

**Figure S2.** <sup>1</sup>H NMR (400 MHz) spectrum of nickel(II) thieno[2,3-*b*]-5,10,15,20-tetraphenylporphyrin (**3a**) in CDCl<sub>3</sub>.

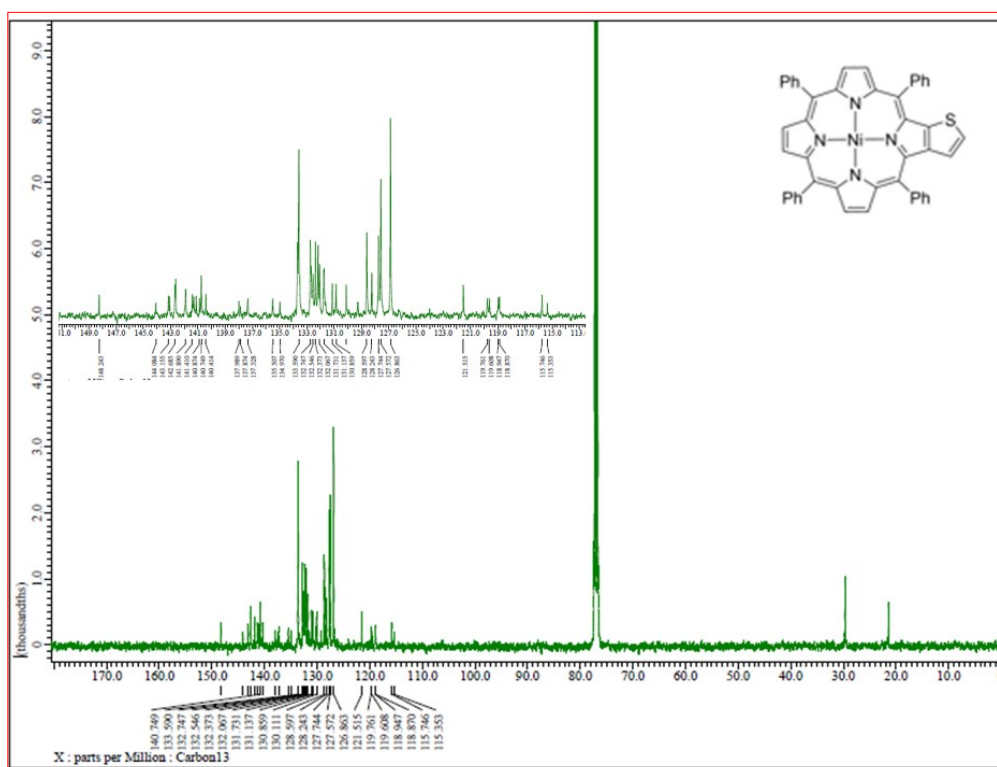

**Figure S3.** <sup>13</sup>C NMR (100 MHz) spectrum of nickel(II) thieno[2,3-*b*]-5,10,15,20-tetraphenylporphyrin (**3a**) in CDCl<sub>3</sub>.

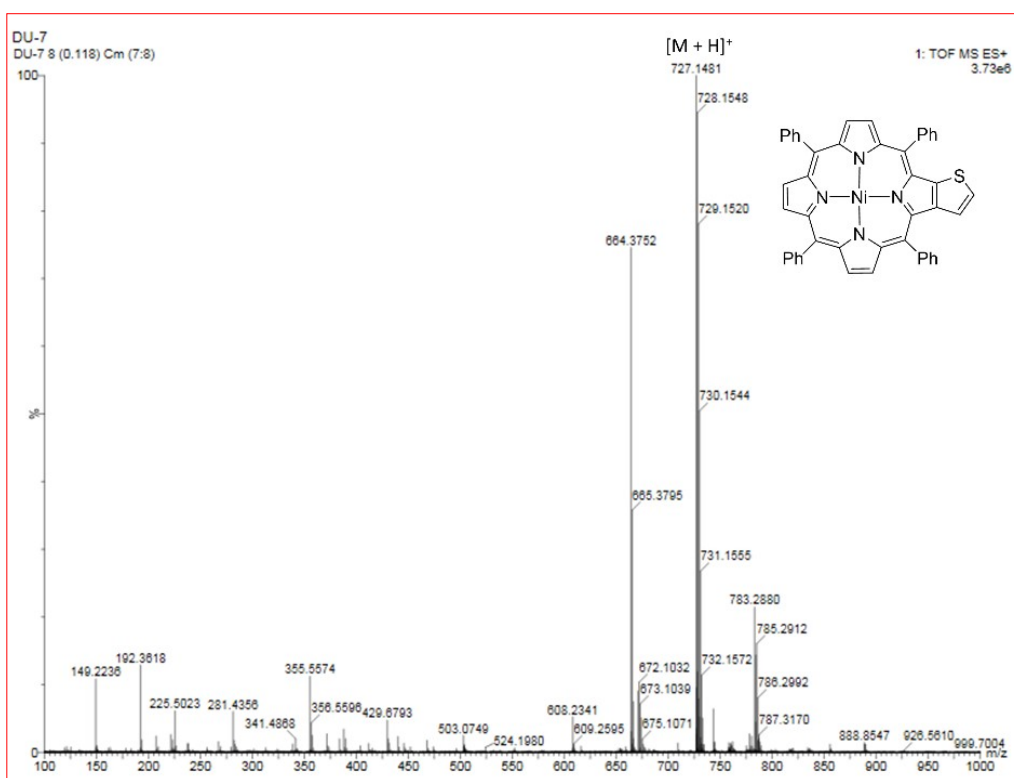

**Figure S4.** ESI high resolution mass spectrum of nickel(II) thieno[2,3-*b*]-5,10,15,20-tetraphenylporphyrin (**3a**).

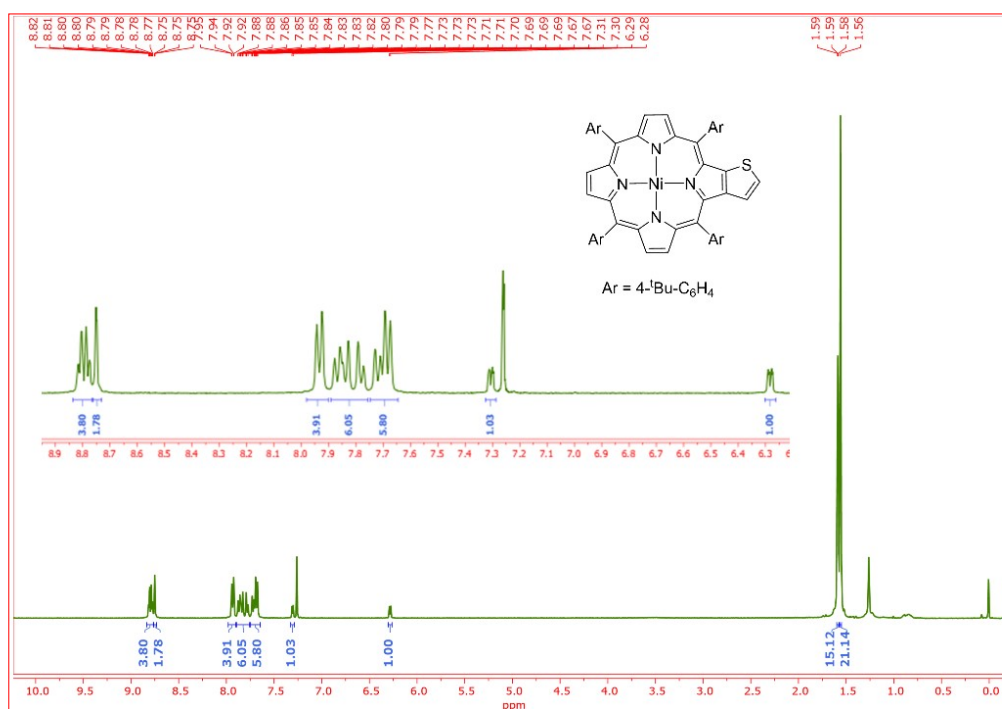

**Figure S5.** <sup>1</sup>H NMR (400 MHz) spectrum of nickel(II) thieno[2,3-*b*]-5,10,15,20-tetrakis(4-*t*-butylphenyl)porphyrin (**3b**) in CDCl<sub>3</sub>.

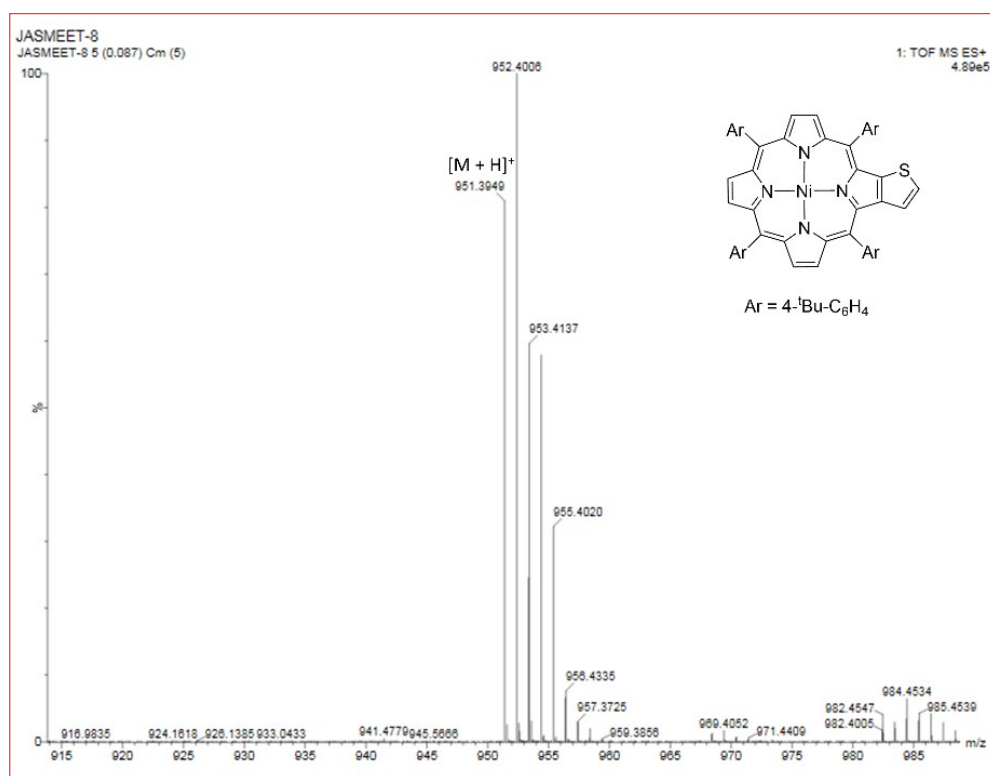

**Figure S6.** ESI high resolution mass spectrum of nickel(II) thieno[2,3-*b*]-5,10,15,20-tetrakis(4-<sup>t</sup>butylphenyl)porphyrin (**3b**).

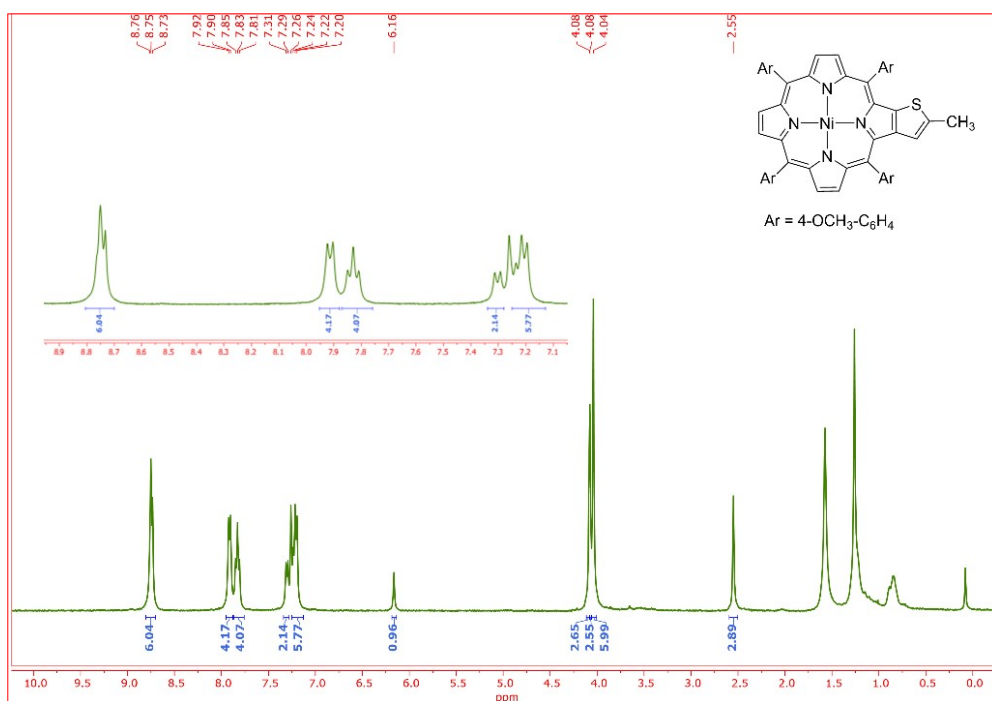

**Figure S7.** <sup>1</sup>H NMR (400 MHz) spectrum of nickel(II) 5-methylthieno[2,3-*b*]-5,10,15,20-tetrakis(4-methoxyphenyl)porphyrin (**3c**) in CDCl<sub>3</sub>.

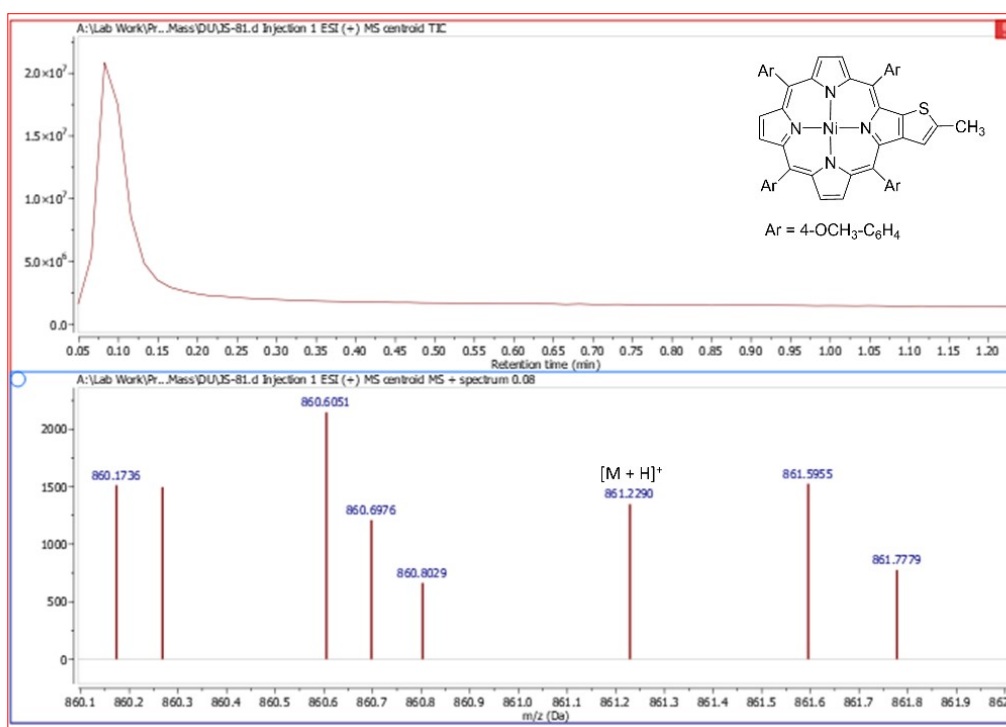

**Figure S8.** ESI high resolution mass spectrum of nickel(II) 5-methylthieno[2,3-*b*]-5,10,15,20-tetrakis(4-methoxyphenyl)porphyrin (**3c**).

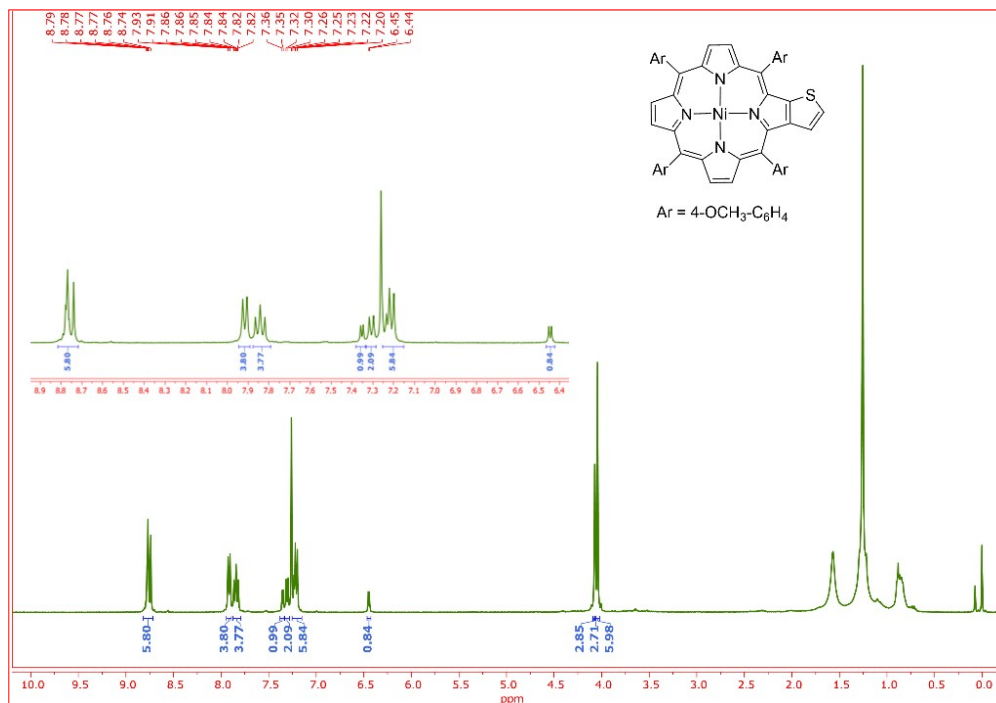

**Figure S9.** <sup>1</sup>H NMR (400 MHz) spectrum of nickel(II) thieno[2,3-*b*]-5,10,15,20-tetrakis(4-methoxyphenyl)porphyrin (**3d**) in CDCl<sub>3</sub>.

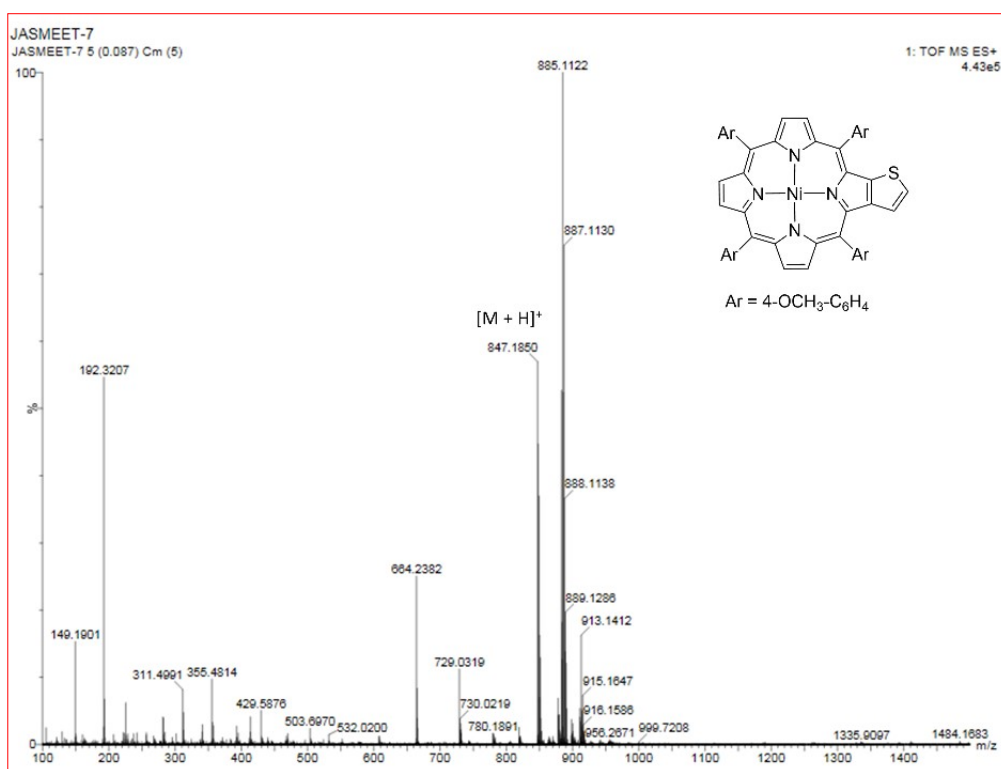

**Figure S10.** ESI high resolution mass spectrum of nickel(II) thieno[2,3-*b*]-5,10,15,20-tetrakis(4-methoxyphenyl)porphyrin (**3d**).

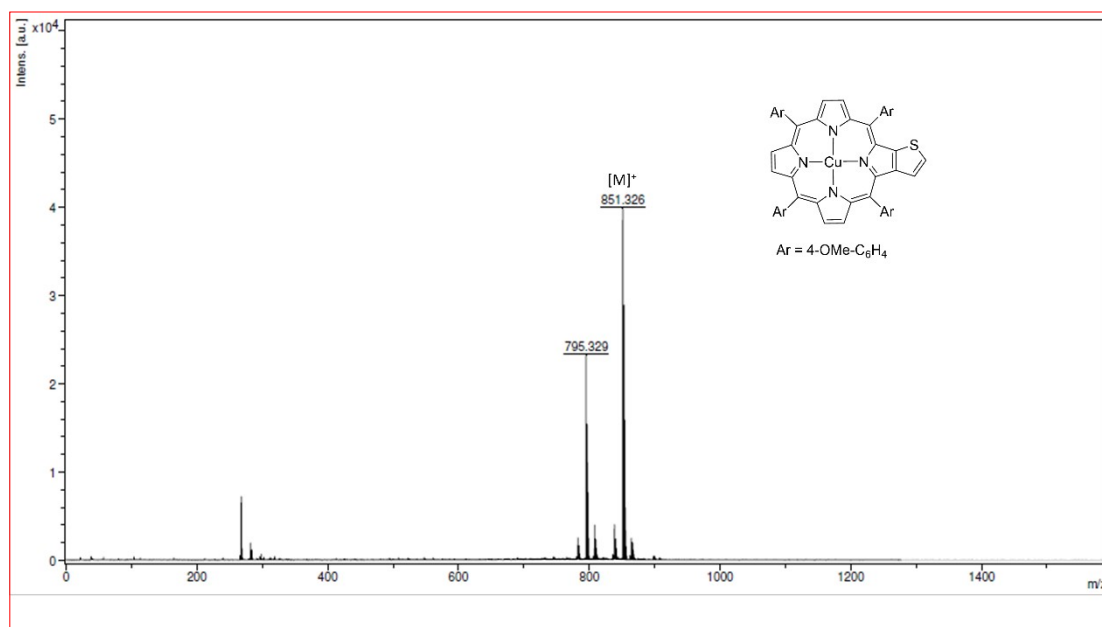

**Figure S11.** MALDI-TOF mass spectrum of copper(II) thieno[2,3-*b*]-5,10,15,20-tetrakis(4-methoxyphenyl)porphyrin (**3e**).

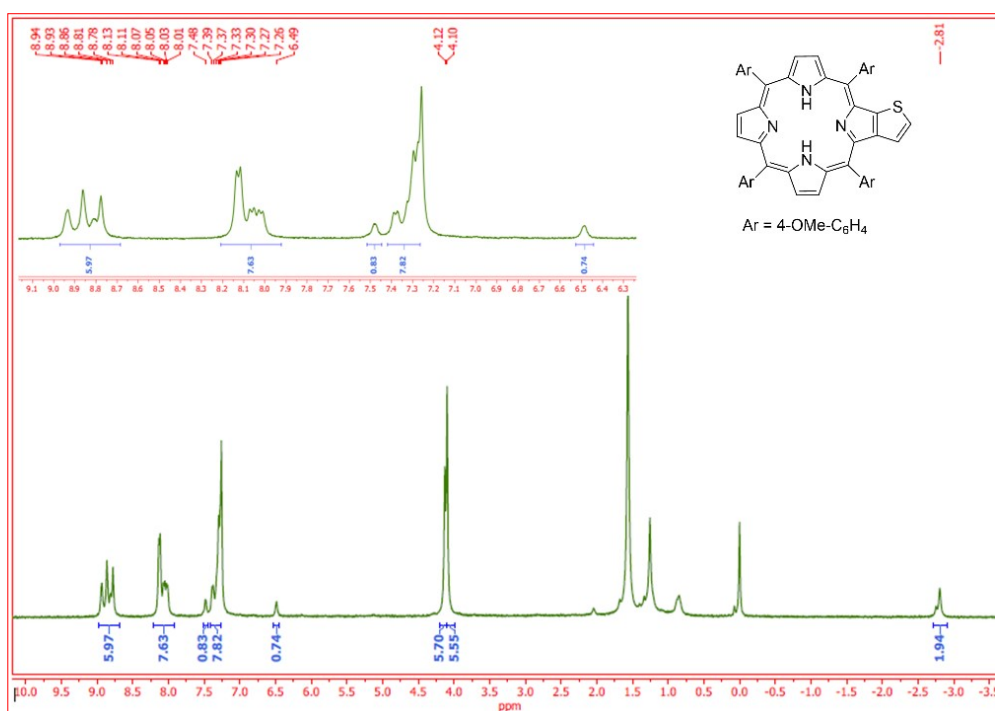

**Figure S12.**  $^1\text{H}$  NMR (400 MHz) spectrum of thieno[2,3-*b*]-5,10,15,20-tetrakis(4-methoxyphenyl)porphyrin (**3f**) in  $\text{CDCl}_3$ .

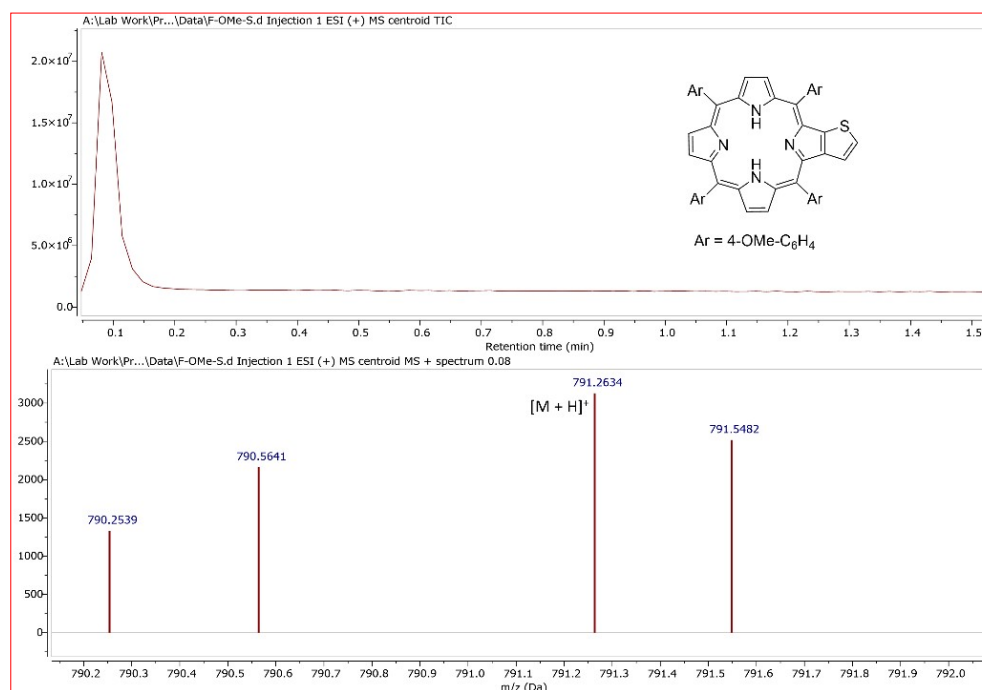

**Figure S13.** ESI high resolution mass spectrum of thieno[2,3-*b*]-5,10,15,20-tetrakis(4-methoxyphenyl)porphyrin (**3f**).



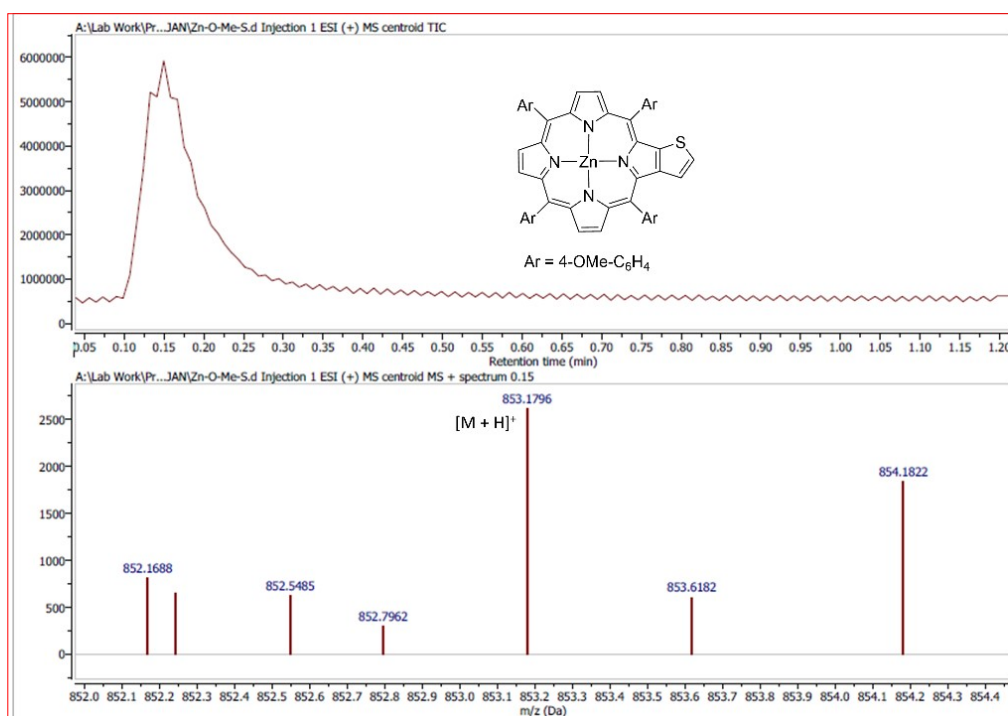

**Figure S14.** <sup>1</sup>H NMR (400 MHz) spectrum of zinc(II) thieno[2,3-*b*]-5,10,15,20-tetrakis(4-methoxyphenyl)porphyrin (**3g**) in CDCl<sub>3</sub>.

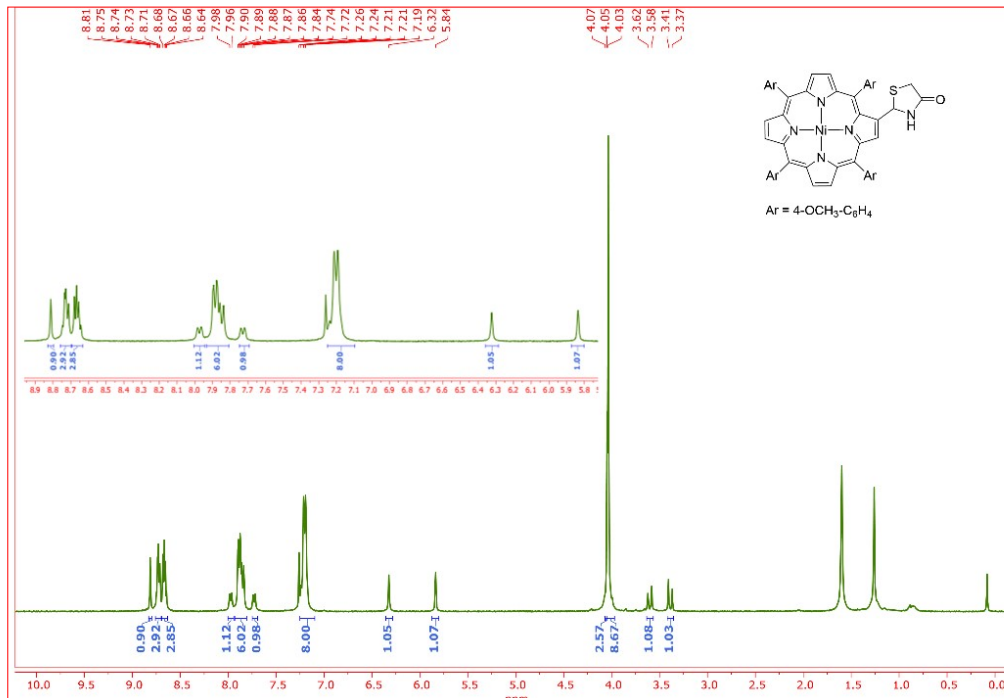

**Figure S15.** <sup>1</sup>H NMR (400 MHz) spectrum of nickel(II) 2-[2'-(5,10,15,20-tetrakis(4-methoxyphenyl)porphyrin)]thiazolidin-4-one (**4a**) in CDCl<sub>3</sub>.

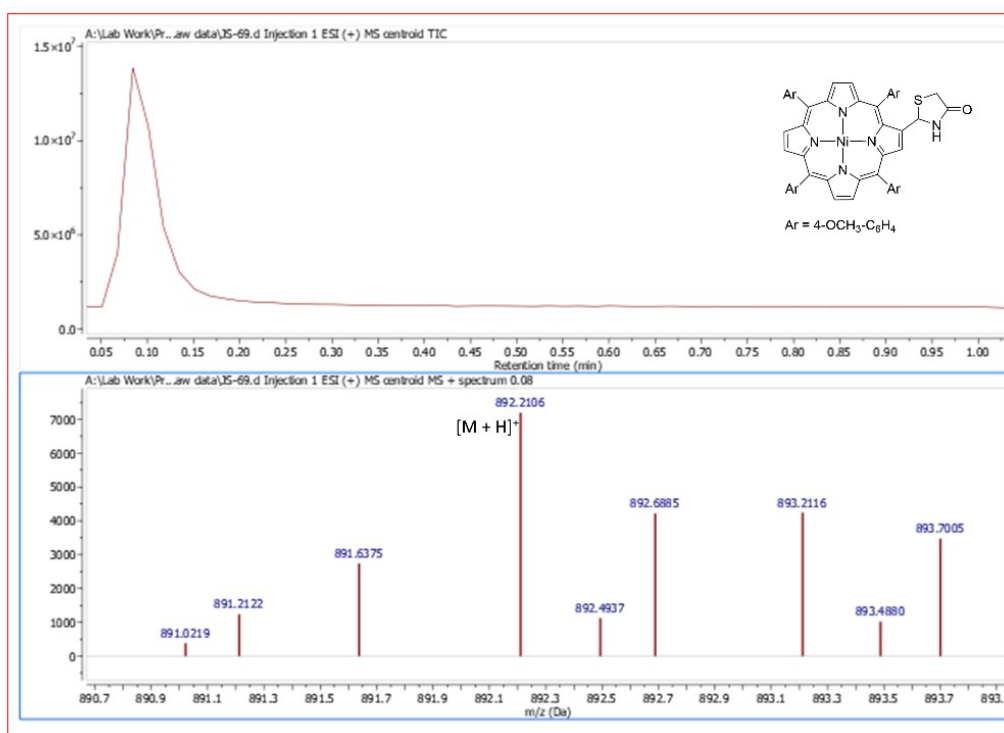

**Figure S16.** ESI high resolution mass spectrum of nickel(II) 2-[2'-(5,10,15,20-tetrakis(4-methoxyphenyl)porphyrin)]thiazolidin-4-one (**4a**).

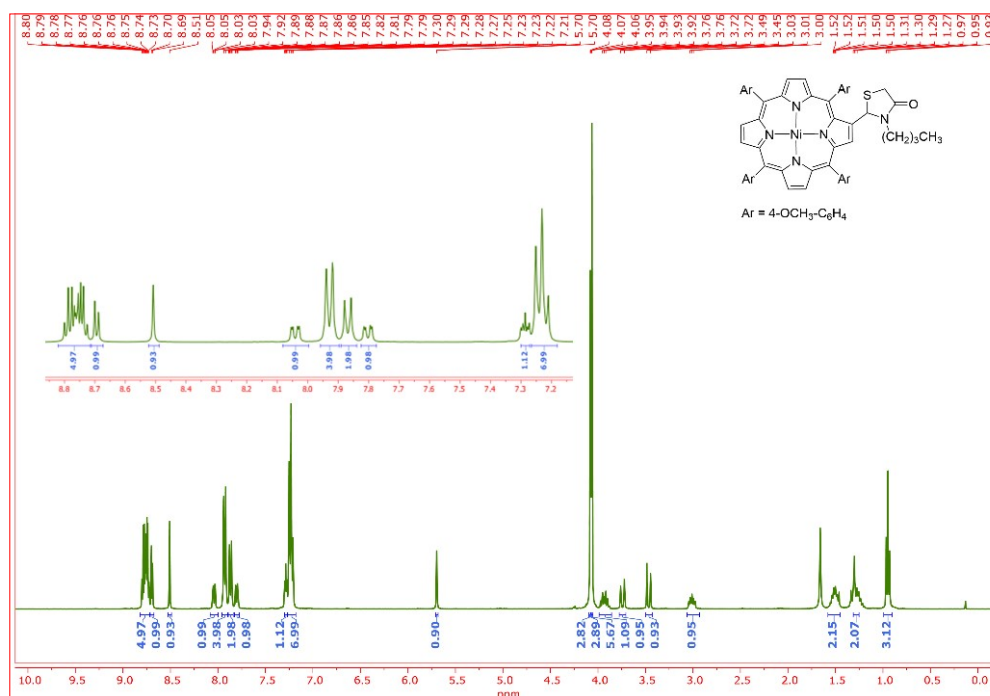

**Figure S17.**  $^1H$  NMR (400 MHz) spectrum of nickel(II) 3-butyl-2-[2'-(5,10,15,20-tetrakis(4-methoxyphenyl)porphyrin)]thiazolidin-4-one (**4b**) in  $CDCl_3$ .

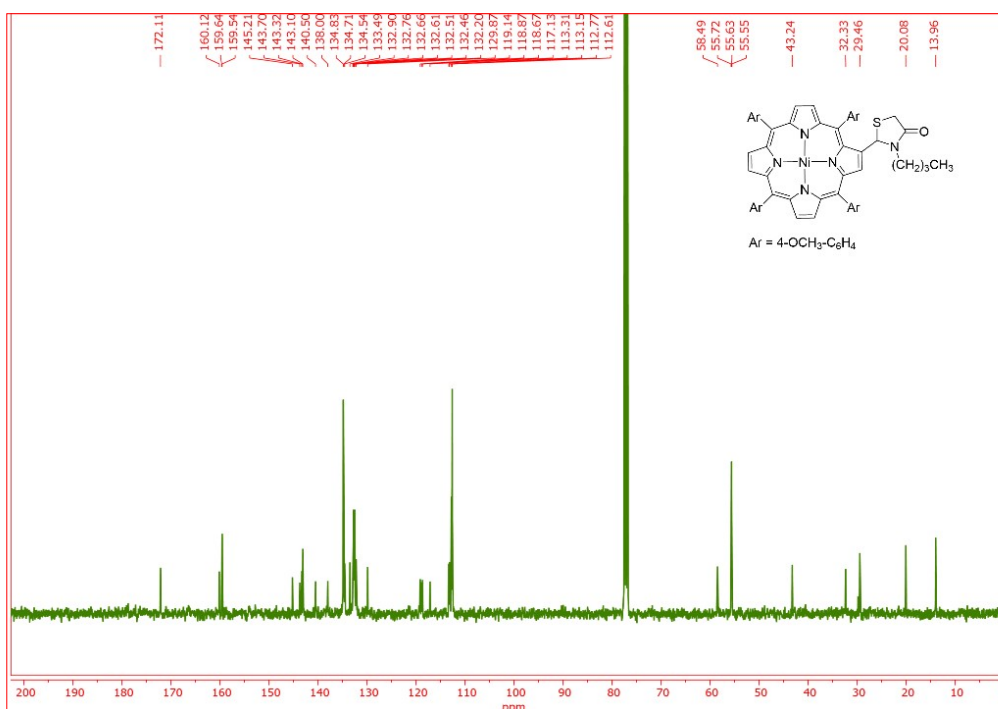

**Figure S18.** <sup>13</sup>C NMR (100 MHz) spectrum of nickel(II) 3-butyl-2-[2'-(5,10,15,20-tetrakis(4-methoxyphenyl)porphyrin)]thiazolidin-4-one (**4b**) in CDCl<sub>3</sub>.

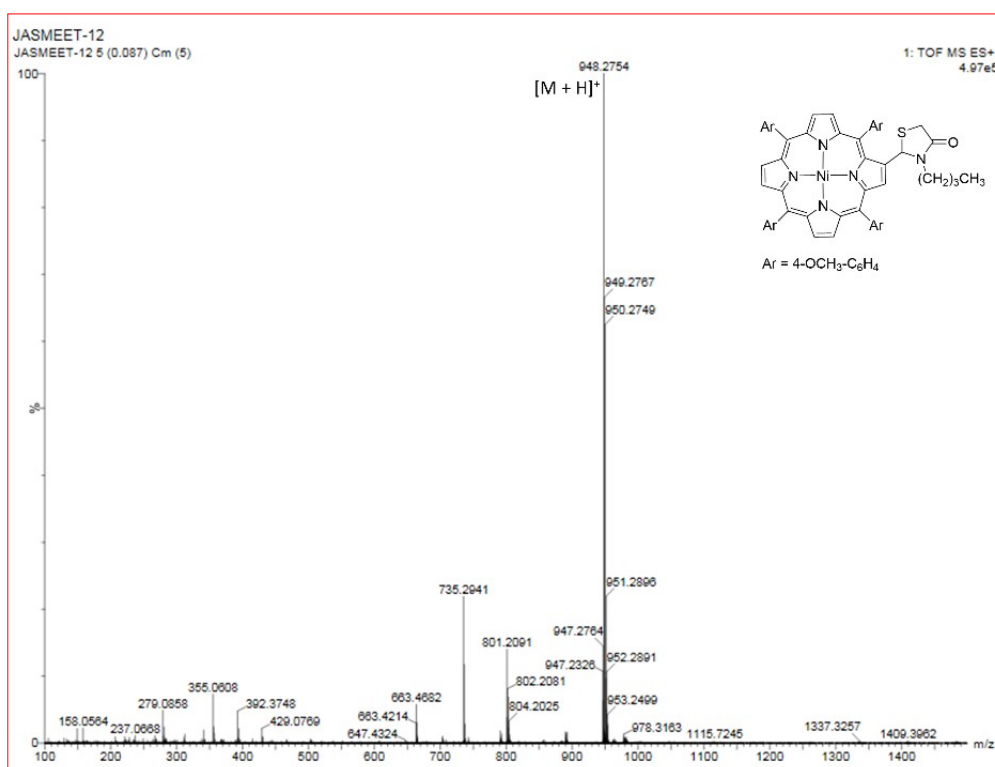

**Figure S19.** ESI high resolution mass spectrum of nickel(II) 3-butyl-2-[2'-(5,10,15,20-tetrakis(4-methoxyphenyl)porphyrin)]thiazolidin-4-one (**4b**).

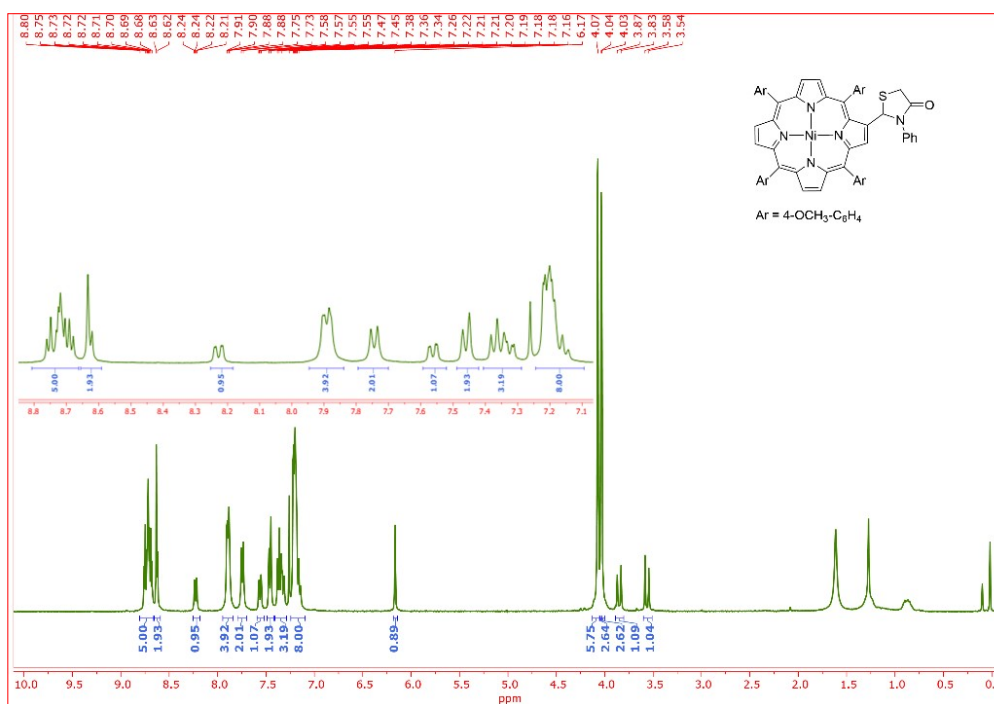

**Figure S20.** <sup>1</sup>H NMR (400 MHz) spectrum of nickel(II) 3-phenyl-2-[2'-(5,10,15,20-tetrakis(4-methoxyphenyl)porphyrin)]thiazolidin-4-one (**4c**) in CDCl<sub>3</sub>.

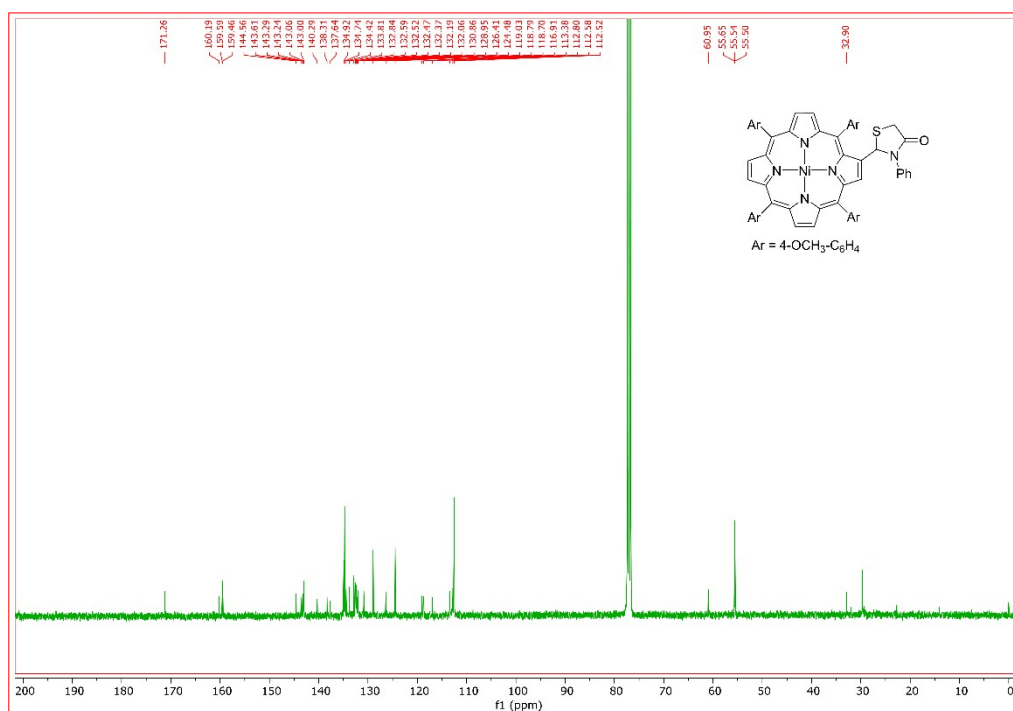

**Figure S21.** <sup>13</sup>C NMR (100 MHz) spectrum of nickel(II) 3-phenyl-2-[2'-(5,10,15,20-tetrakis(4-methoxyphenyl)porphyrin)]thiazolidin-4-one (**4c**) in CDCl<sub>3</sub>.

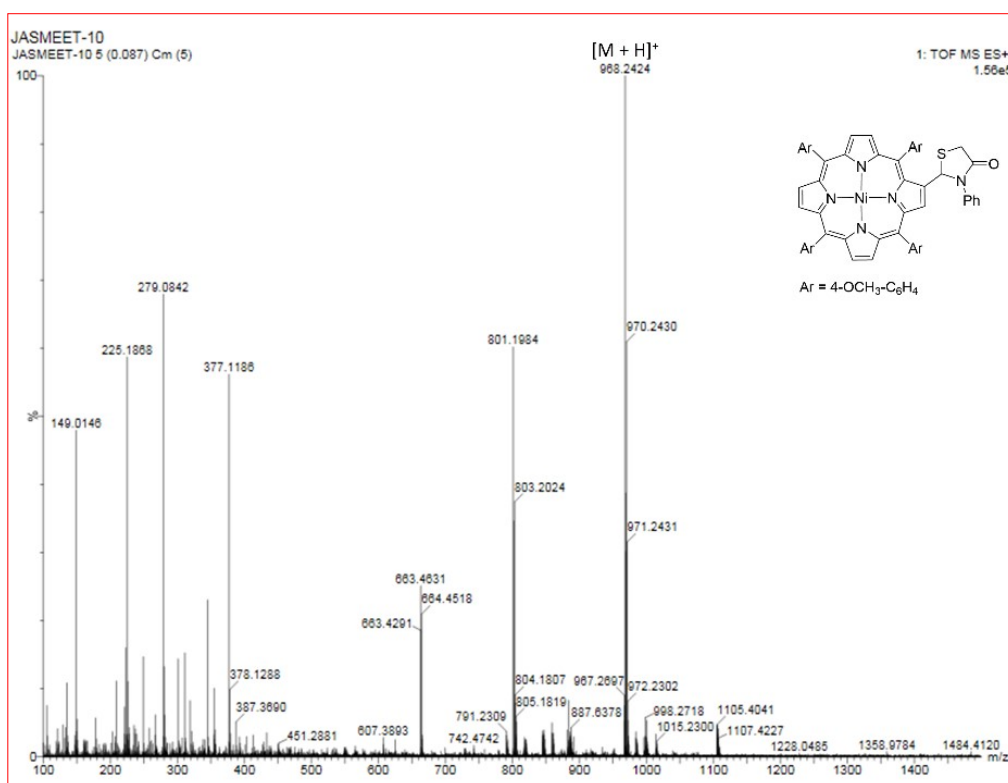

**Figure S22.** ESI high resolution mass spectrum of nickel(II) 3-phenyl-2-[2'-(5,10,15,20-tetrakis(4-methoxyphenyl)porphyrin)]thiazolidin-4-one (**4c**).

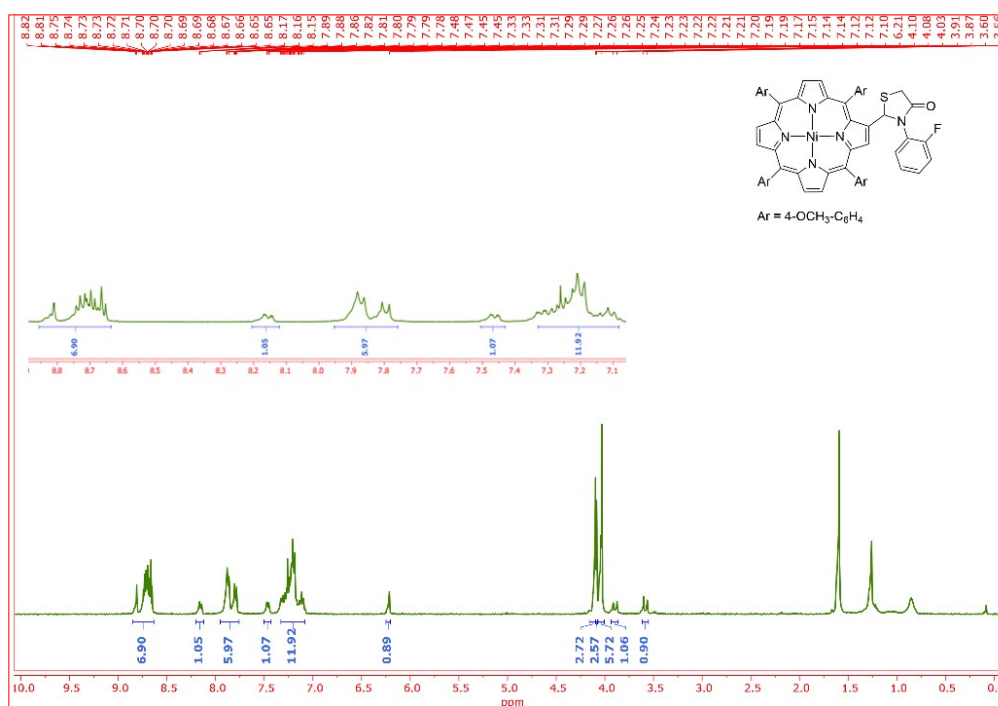

**Figure S23.** <sup>1</sup>H NMR (400 MHz) spectrum of nickel(II) 3-(2-fluorophenyl)-2-[2'-(5,10,15,20-tetrakis(4-methoxyphenyl)porphyrin)]thiazolidin-4-one (**4d**) in CDCl<sub>3</sub>.

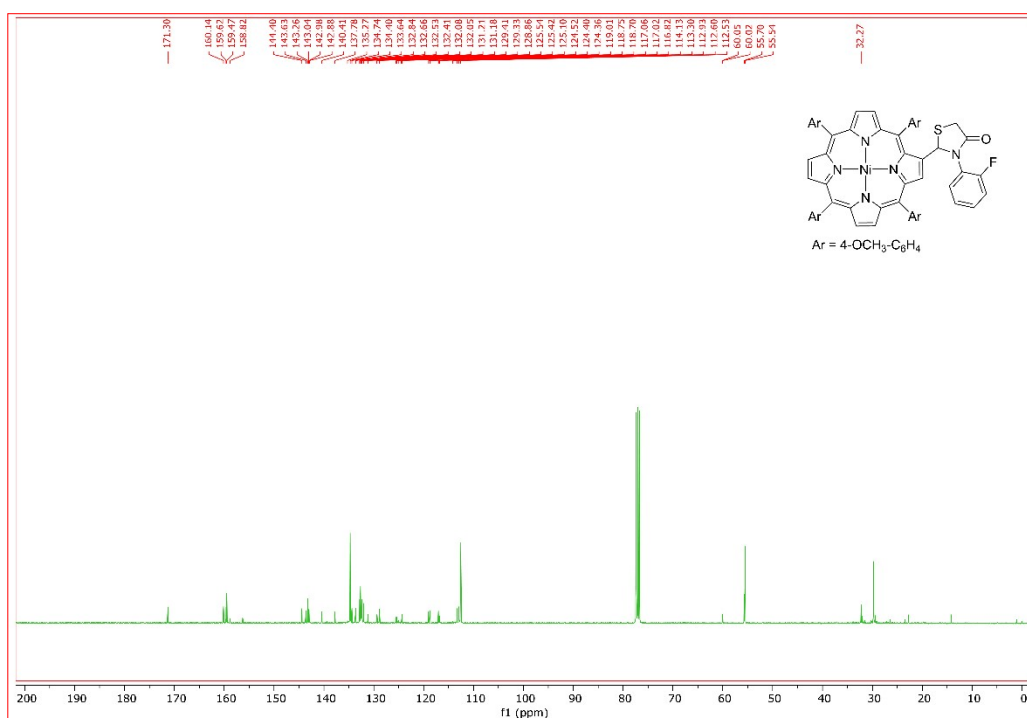

**Figure S24.**  $^{13}\text{C}$  NMR (100 MHz) spectrum of nickel(II) 3-(2-fluorophenyl)-2-[2'-(5,10,15,20-tetrakis(4-methoxyphenyl)porphyrin)]thiazolidin-4-one (**4d**) in  $\text{CDCl}_3$ .

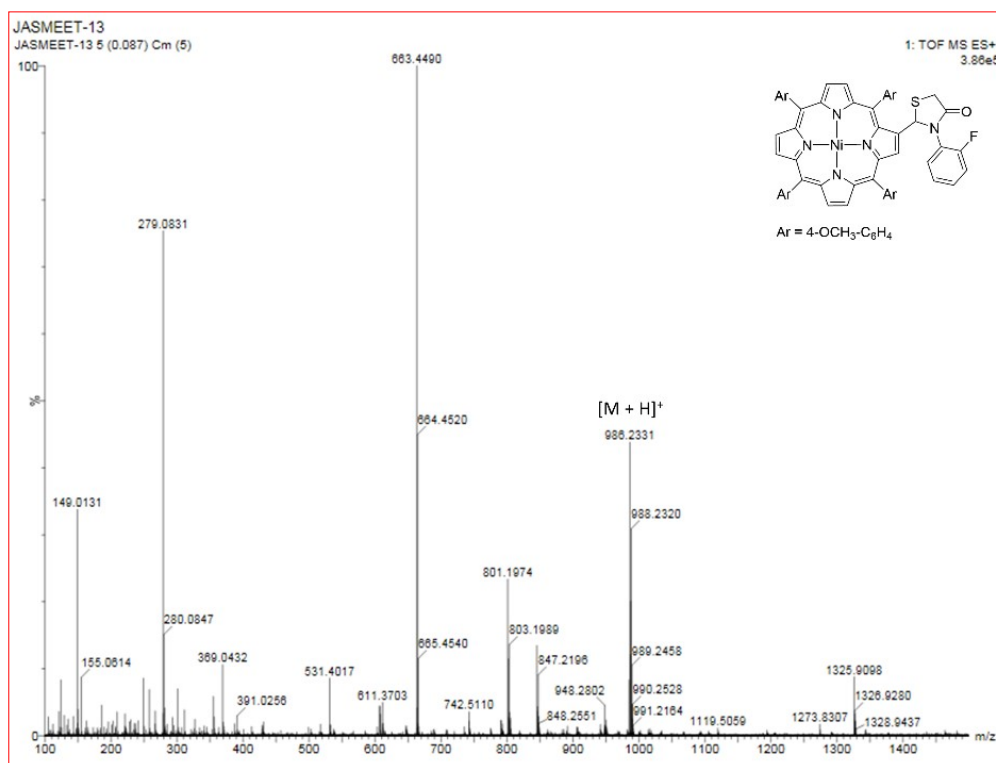

**Figure S25.** ESI high resolution mass spectrum of nickel(II) 3-(2-fluorophenyl)-2-[2'-(5,10,15,20-tetrakis(4-methoxyphenyl)porphyrin)]thiazolidin-4-one (**4d**).

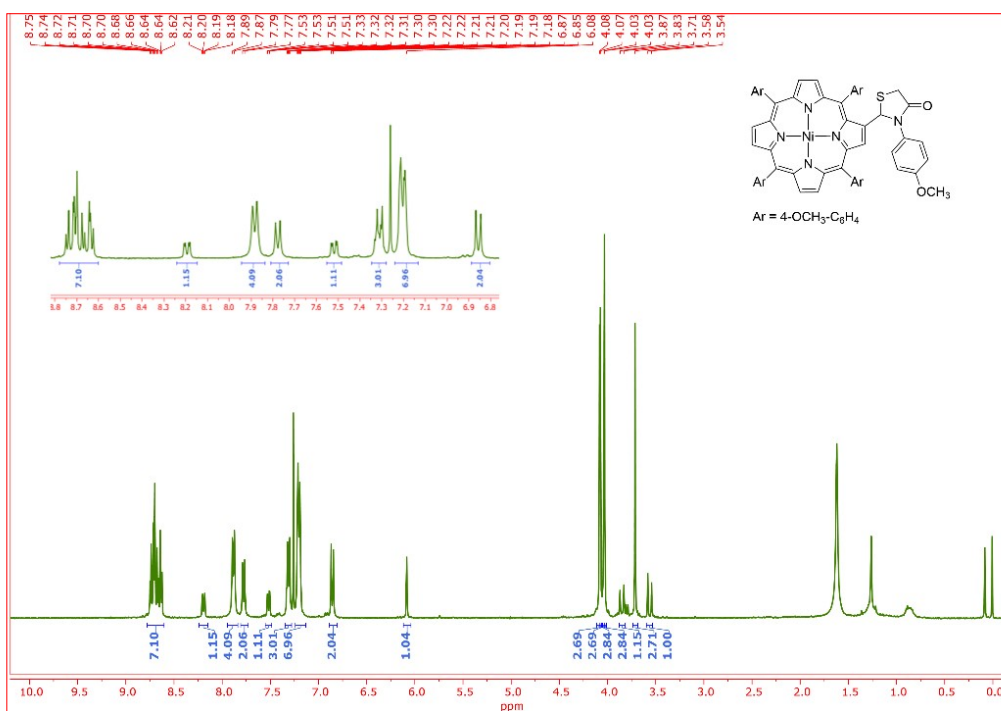

**Figure S26.** <sup>1</sup>H NMR (400 MHz) spectrum of nickel(II) 3-(4-methoxyphenyl)-2-[2'-(5,10,15,20-tetrakis(4-methoxyphenyl)porphyrin)]thiazolidin-4-one (**4e**) in CDCl<sub>3</sub>.

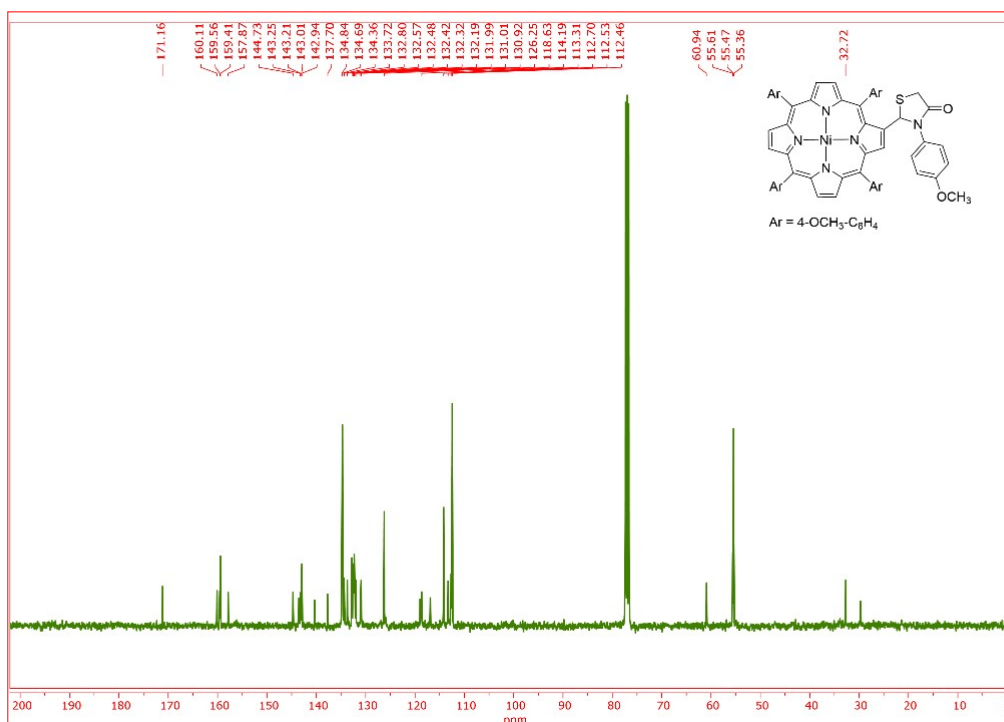

**Figure S27.** <sup>13</sup>C NMR (100 MHz) spectrum of nickel(II) 3-(4-methoxyphenyl)-2-[2'-(5,10,15,20-tetrakis(4-methoxyphenyl)porphyrin)]thiazolidin-4-one (**4e**) in CDCl<sub>3</sub>.

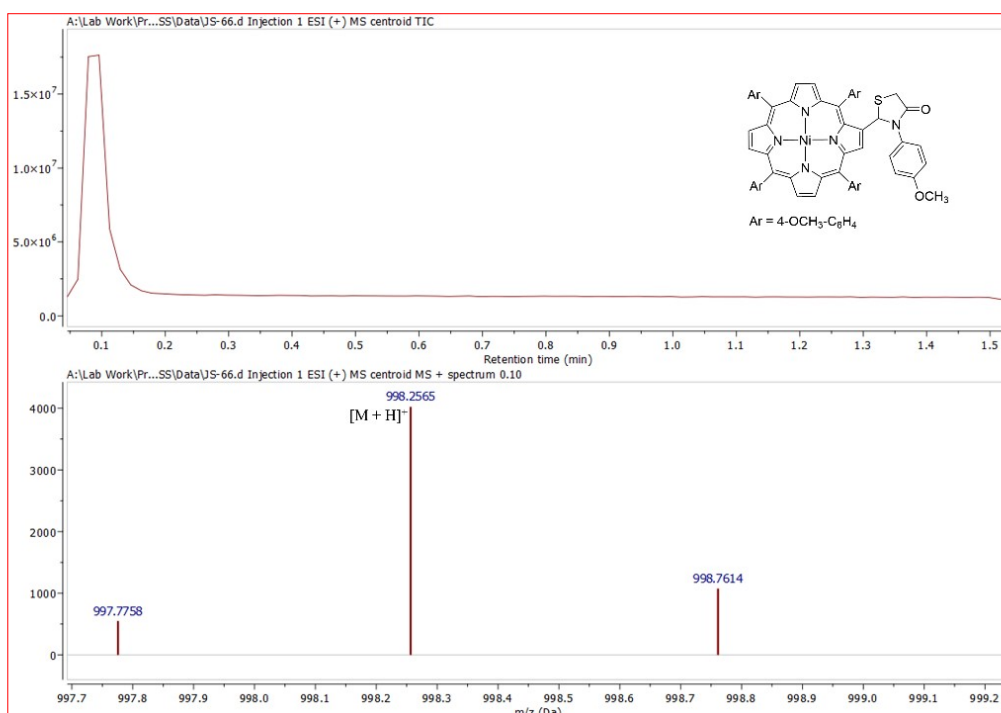

**Figure S28.** ESI high resolution mass spectrum of nickel(II) 3-(4-methoxyphenyl)-2-[2'-(5,10,15,20-tetrakis(4-methoxyphenyl)porphyrin)]thiazolidin-4-one (**4e**).

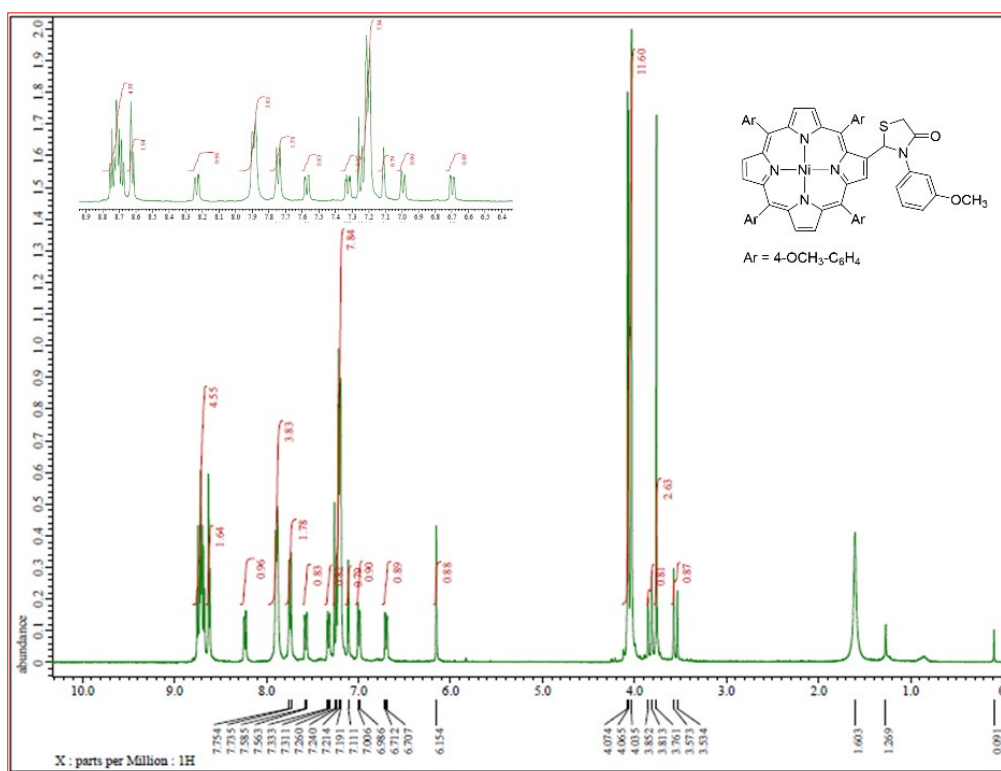

**Figure S29.**  $^1H$  NMR (400 MHz) spectrum of nickel(II) 3-(3-methoxyphenyl)-2-[2'-(5,10,15,20-tetrakis(4-methoxyphenyl)porphyrin)]thiazolidin-4-one (**4f**) in  $CDCl_3$ .



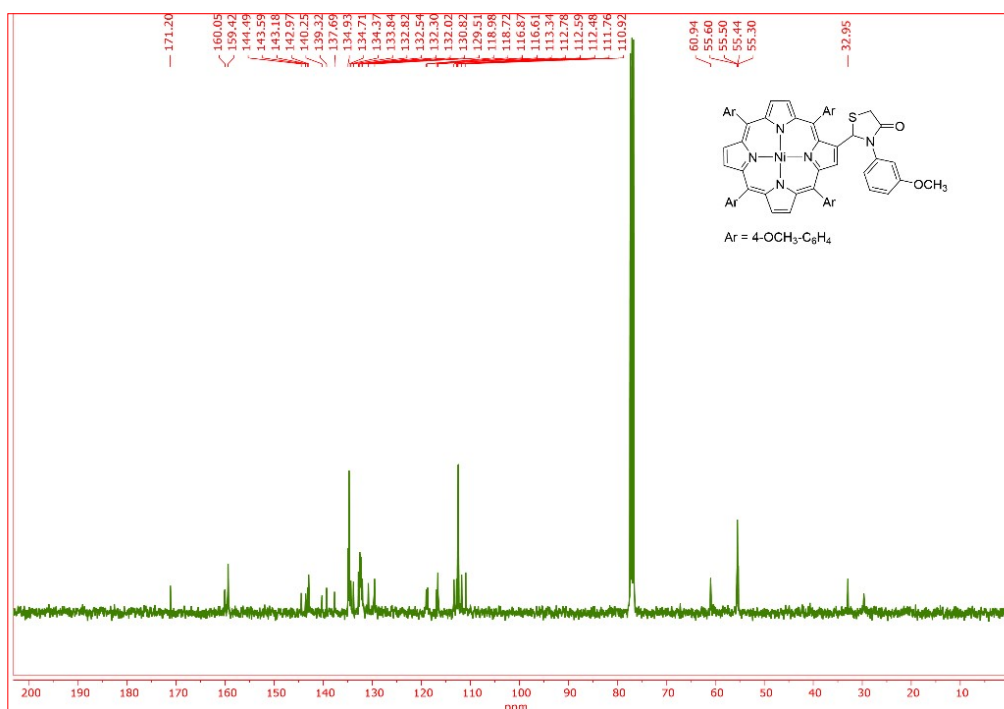

**Figure S30.** <sup>13</sup>C NMR (100 MHz) spectrum of nickel(II) 3-(3-methoxyphenyl)-2-[2'-(5,10,15,20-tetrakis(4-methoxyphenyl)porphyrin)]thiazolidin-4-one (**4f**) in CDCl<sub>3</sub>.

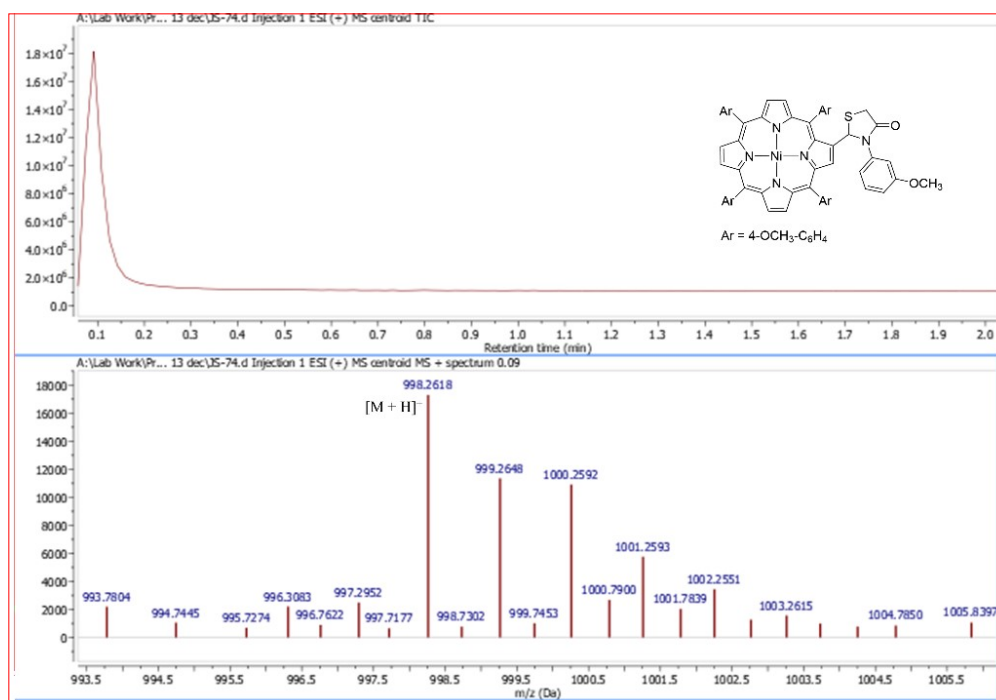

**Figure S31.** ESI high resolution mass spectrum of nickel(II) 3-(3-methoxyphenyl)-2-[2'-(5,10,15,20-tetrakis(4-methoxyphenyl)porphyrin)]thiazolidin-4-one (**4f**).

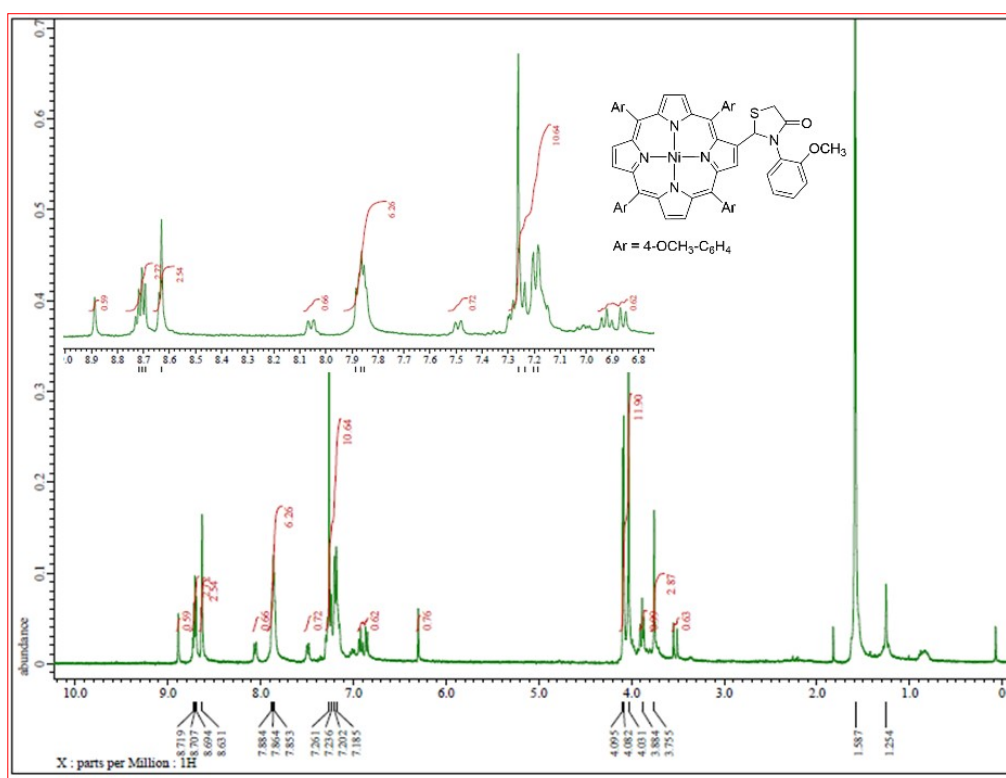

**Figure S32.**  $^1\text{H}$  NMR (400 MHz) spectrum of nickel(II) 3-(2-methoxyphenyl)-2-[2'-(5,10,15,20-tetrakis(4-methoxyphenyl)porphyrin)]thiazolidin-4-one (**4g**) in  $\text{CDCl}_3$ .

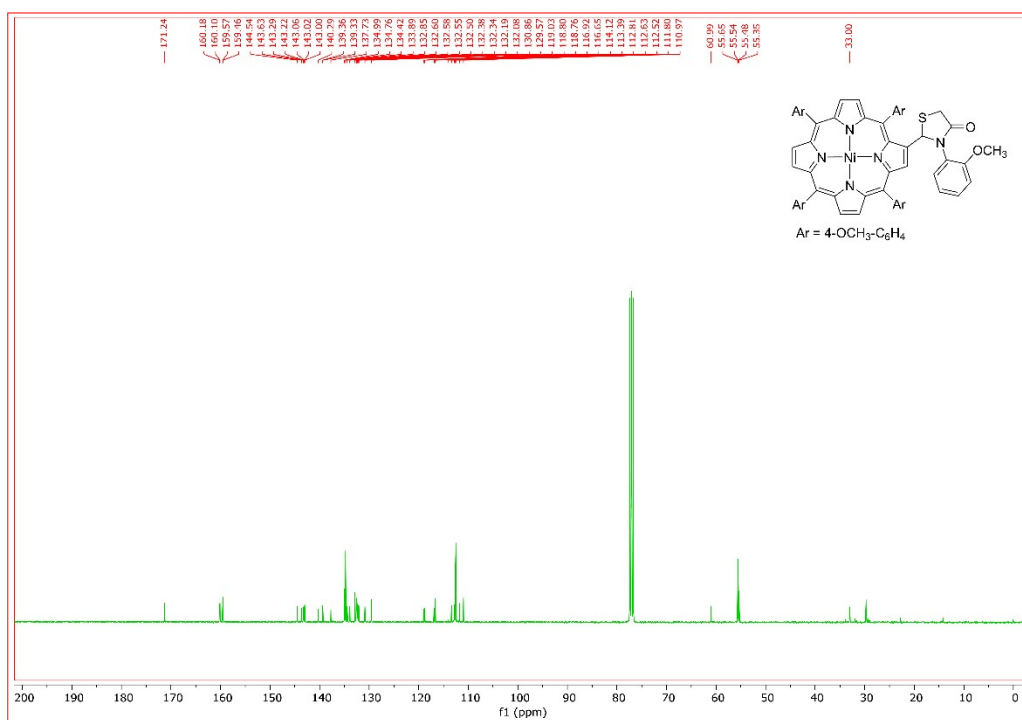

**Figure S33.**  $^{13}\text{C}$  NMR (100 MHz) spectrum of nickel(II) 3-(2-methoxyphenyl)-2-[2'-(5,10,15,20-tetrakis(4-methoxyphenyl)porphyrin)]thiazolidin-4-one (**4g**) in  $\text{CDCl}_3$ .

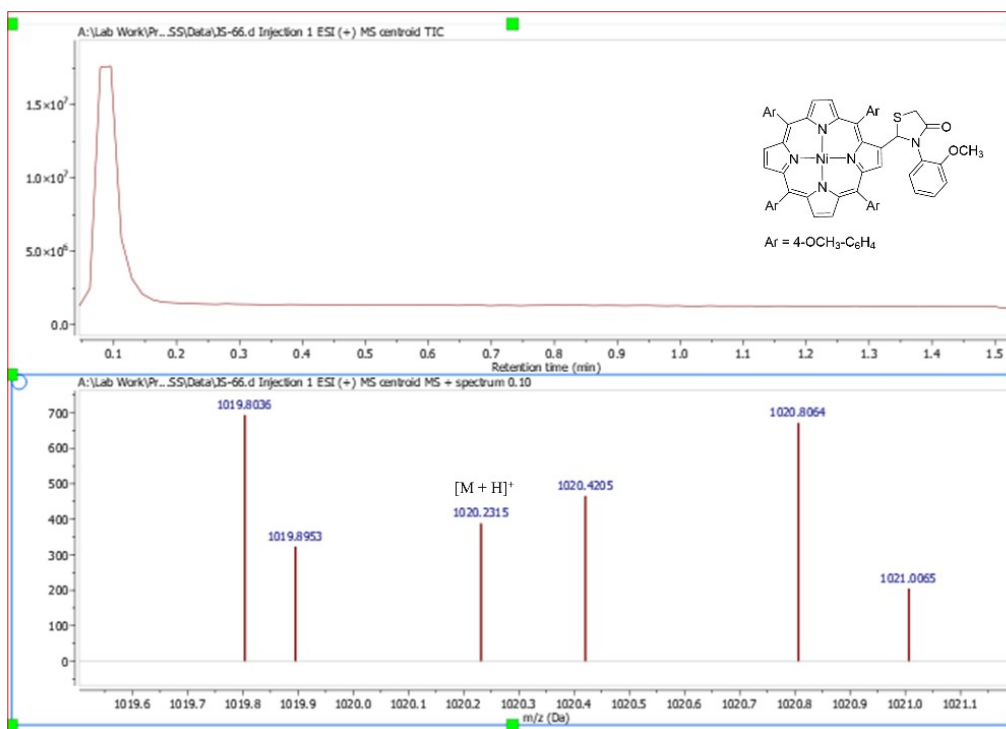

**Figure S34.** ESI high resolution mass spectrum of nickel(II) 3-(2-methoxyphenyl)-2-[2'-(5,10,15,20-tetrakis(4-methoxyphenyl)porphyrin)]thiazolidin-4-one (**4g**).
